# Supplementary material
Source: PubMed Central journal article supplement (PMC5606287)
Supplement: NIHMS73423-supplement-Supplementary_Data.pdf [file NIHMS73423-supplement-Supplementary_Data.pdf]

## SUPPLEMENTARY DATA

### Supplementary Figure S1

SIP(F8):

Sequence of monomer: EVQLLES GGGGLVQP GGSRLRLSCAASGFT  
FSLFTMSWVRQAPGKGLEWVSAISGSGGSTYYADSVK  
GRFTISRDN SKNTLYLQMNSLRAEDTAVYYCAKSTHLY  
LFDYWGQGT LVTVSSGGGGSGGGGGSGGGGGEIVLTQSP  
GTL<sup>**S**</sup>LSLSPGERATLSCRASQSVSMPFLAWYQQKPGQAPR  
LLIYGASSRATGIPDRFSGSGSGTDFTLTISRLEPEDFAV  
YYCQQMRGRPPTFGQGTKVEIKSGGSGGPRAAPEVYAF  
ATPEWPGSRDKRTLACLIQNFMPEDISVQWLHNEVQLP  
DARHSTTQPRKTKGSGFFVFSRLEVTRAWEQKDEFIC  
RAVHEAASPSQTVQRAVSVNPESRRGGC

Calculated mass of monomer: 38728

IgG(F8) HC:

EVQLLES GGGGLVQP GGSRLRLSCAASGFTFSLFTMSWVR  
QAPGKGLEWVSAISGSGGSTYYADSVKGRFTISRDN SK  
NTLYLQMNSLRAEDTAVYYCAKSTHLYLFDYWGQGT L  
VTVSSASTKGPSVFLAPSSKSTSGGTAALGCLVKDYFP  
EPVTVSWNSGALTSGVHTFPAVLQSSGLYSLSSVVTVP  
SSSLGTQTYICNVNHKPSNTKVDKKVEPKS<sup>**S**</sup>DKTHT<sup>**S**</sup>P  
P<sup>**S**</sup>PAPELLGGPSVFLFPPKPKDTLMISRTPEVTCVVVDV  
SHEDPEVKFNWYVDGVEVHNAKTKPREEQYNSTYRVV  
SVLTVLHQDWLNGKEYKCKVSNKALPAPIEKTISKAKG  
QPREPQVYTLPPSRDELTKNQVSLTCLVKGFYPSDIAVE  
WESNGQPENNYKTTTPVLDSDGSFFLYSKLTVDKSRWQ  
QGNVFS<sup>**C**</sup>SV MHEALHNHYTQKSLSLSPGK

Calculated Mass of Heavy Chain: 48796

IgG(F8) LC:

EIVLTQSPGTL<sup>**S**</sup>LSLSPGERATLSCRASQSVSMPFLAWYQQ  
KPGQAPRLLIYGASSRATGIPDRFSGSGSGTDFTLTISR  
LEPEDFAVYYCQQMRGRPPTFGQGTKVEIKRTVAAPSVF  
IFPPSDEQLKSGTASVVCLLNNFYPREAKVQWKVDNAL  
QSGNSQESVTEQDSKDSSTLSSTLTLSKADYEKHKVY  
ACEVTHQGLSSPVT<sup>**K**</sup>SFNRGEC

Calculated Mass of Light Chain: 23480

Amino acid sequences and calculated mass of SIP(F8) monomer and IgG(F8) light and heavy chain. Cysteines used for conjugation are highlighted in bold.

### Supplementary figure S2

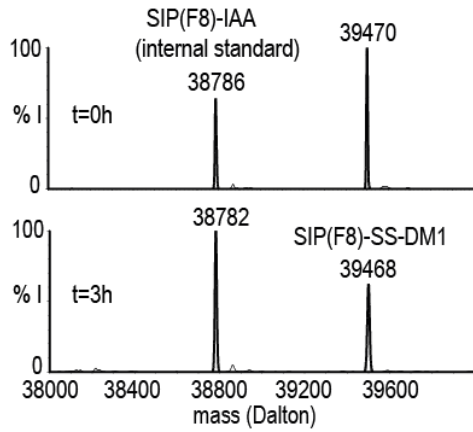

**SIP(F8)-SS-DM1 stability** : ESI-MS spectra of the SIP(F8)-SS-DM1 conjugate after 0 and 3 h of incubation in mice serum in presence of the SIP(F8)-IAA internal standard (Calculated mass = 38784 Da).

### Supplementary figure S3

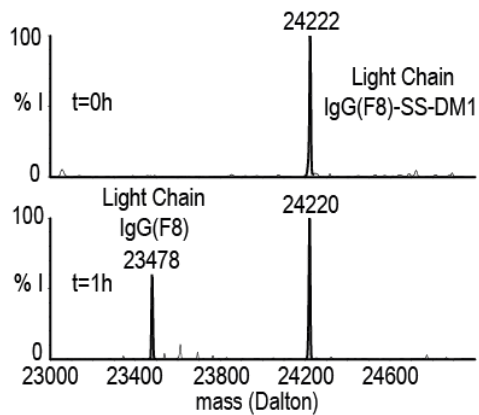

**IgG(F8)-SS-DM1 release test** : ESI-MS spectra of the IgG(F8)-SS-DM1 conjugate after 0 and 1 h of incubation in mice serum in presence of 1mM DTT.

### Supplementary figure S4

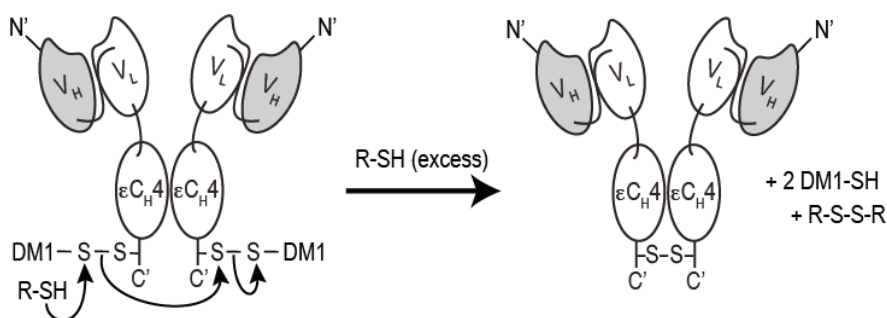

Schematic representation of a proposed mechanism for the formation of disulfide-bonded SIP products, upon cleavage of a first mixed disulfide bond between antibody moiety and DM1-SH drug.

### Supplementary table S1: Biodistribution results

|         | SIP(F8)-SS-DM1 |             |             | IgG(F8)-SS-DM1 |              |              |
|---------|----------------|-------------|-------------|----------------|--------------|--------------|
|         | 3h             | 24h         | 48h         | 3h             | 24h          | 48h          |
| Tumor   | 8.18 ± 1.23    | 7.80 ± 1.97 | 3.11 ± 0.52 | 12.18 ± 0.97   | 32.80 ± 1.37 | 24.96 ± 2.61 |
| Liver   | 1.84 ± 0.89    | 0.32 ± 0.09 | 0.12 ± 0.01 | 9.74 ± 0.57    | 4.51 ± 0.50  | 2.85 ± 0.18  |
| Lung    | 5.33 ± 2.71    | 0.69 ± 0.35 | 0.21 ± 0.15 | 29.23 ± 1.60   | 11.99 ± 2.15 | 5.54 ± 2.73  |
| Spleen  | 1.65 ± 0.83    | 0.39 ± 0.12 | 0.11 ± 0.06 | 5.35 ± 2.82    | 3.63 ± 0.27  | 1.13 ± 0.63  |
| Heart   | 2.11 ± 0.14    | 0.22 ± 0.04 | 0.07 ± 0.01 | 4.72 ± 4.36    | 3.94 ± 0.58  | 2.73 ± 0.10  |
| Kidney  | 9.75 ± 0.12    | 0.42 ± 0.18 | 0.28 ± 0.11 | 13.45 ± 3.69   | 7.08 ± 0.20  | 4.05 ± 1.15  |
| Colon   | 0.38 ± 0.33    | 0.08 ± 0.03 | 0.18 ± 0.09 | 4.47 ± 4.37    | 7.36 ± 0.98  | 1.38 ± 0.70  |
| Stomach | 1.71 ± 0.38    | 0.61 ± 0.23 | 0.20 ± 0.18 | 1.36 ± 1.11    | 5.99 ± 0.99  | 3.13 ± 1.37  |
| Blood   | 6.62 ± 0.08    | 0.77 ± 0.08 | 0.29 ± 0.03 | 33.49 ± 0.13   | 15.62 ± 2.04 | 9.4 ± 0.89   |

Results of biodistribution experiments, performed in F9 tumor-bearing mice with radioiodinated ADC preparations. Details are presented in the experimental procedures section. Results are expressed as the percent of antibody injected activity per gram of tissue (%IA/g) ± SD
